# Supplementary material
Source: publisher site journal article supplement (https://www.dovepress.com/article/588177)
Supplement: Supplementary file 1 [file 588177%20Revised%20Supplementary%20materials.docx]

# **Supplementary Figures**


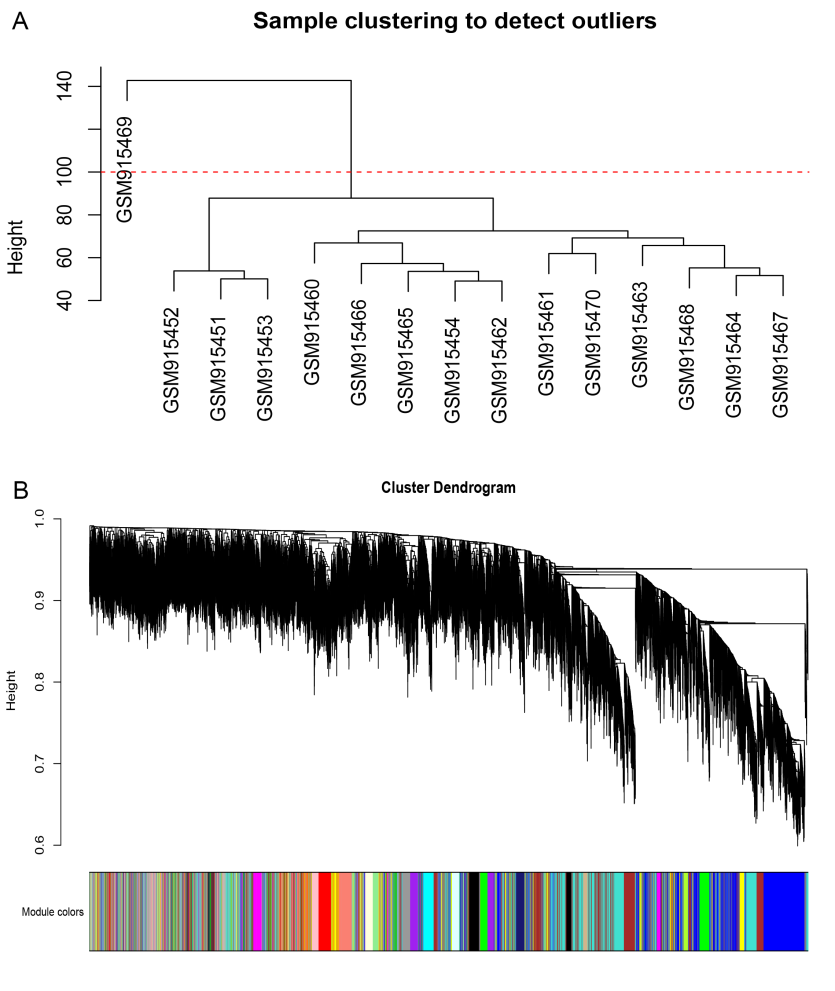


Supplementary Figure 1.(A) Sample clustering to detect outliers; (B) Dendrograms of genes and trait clustering.


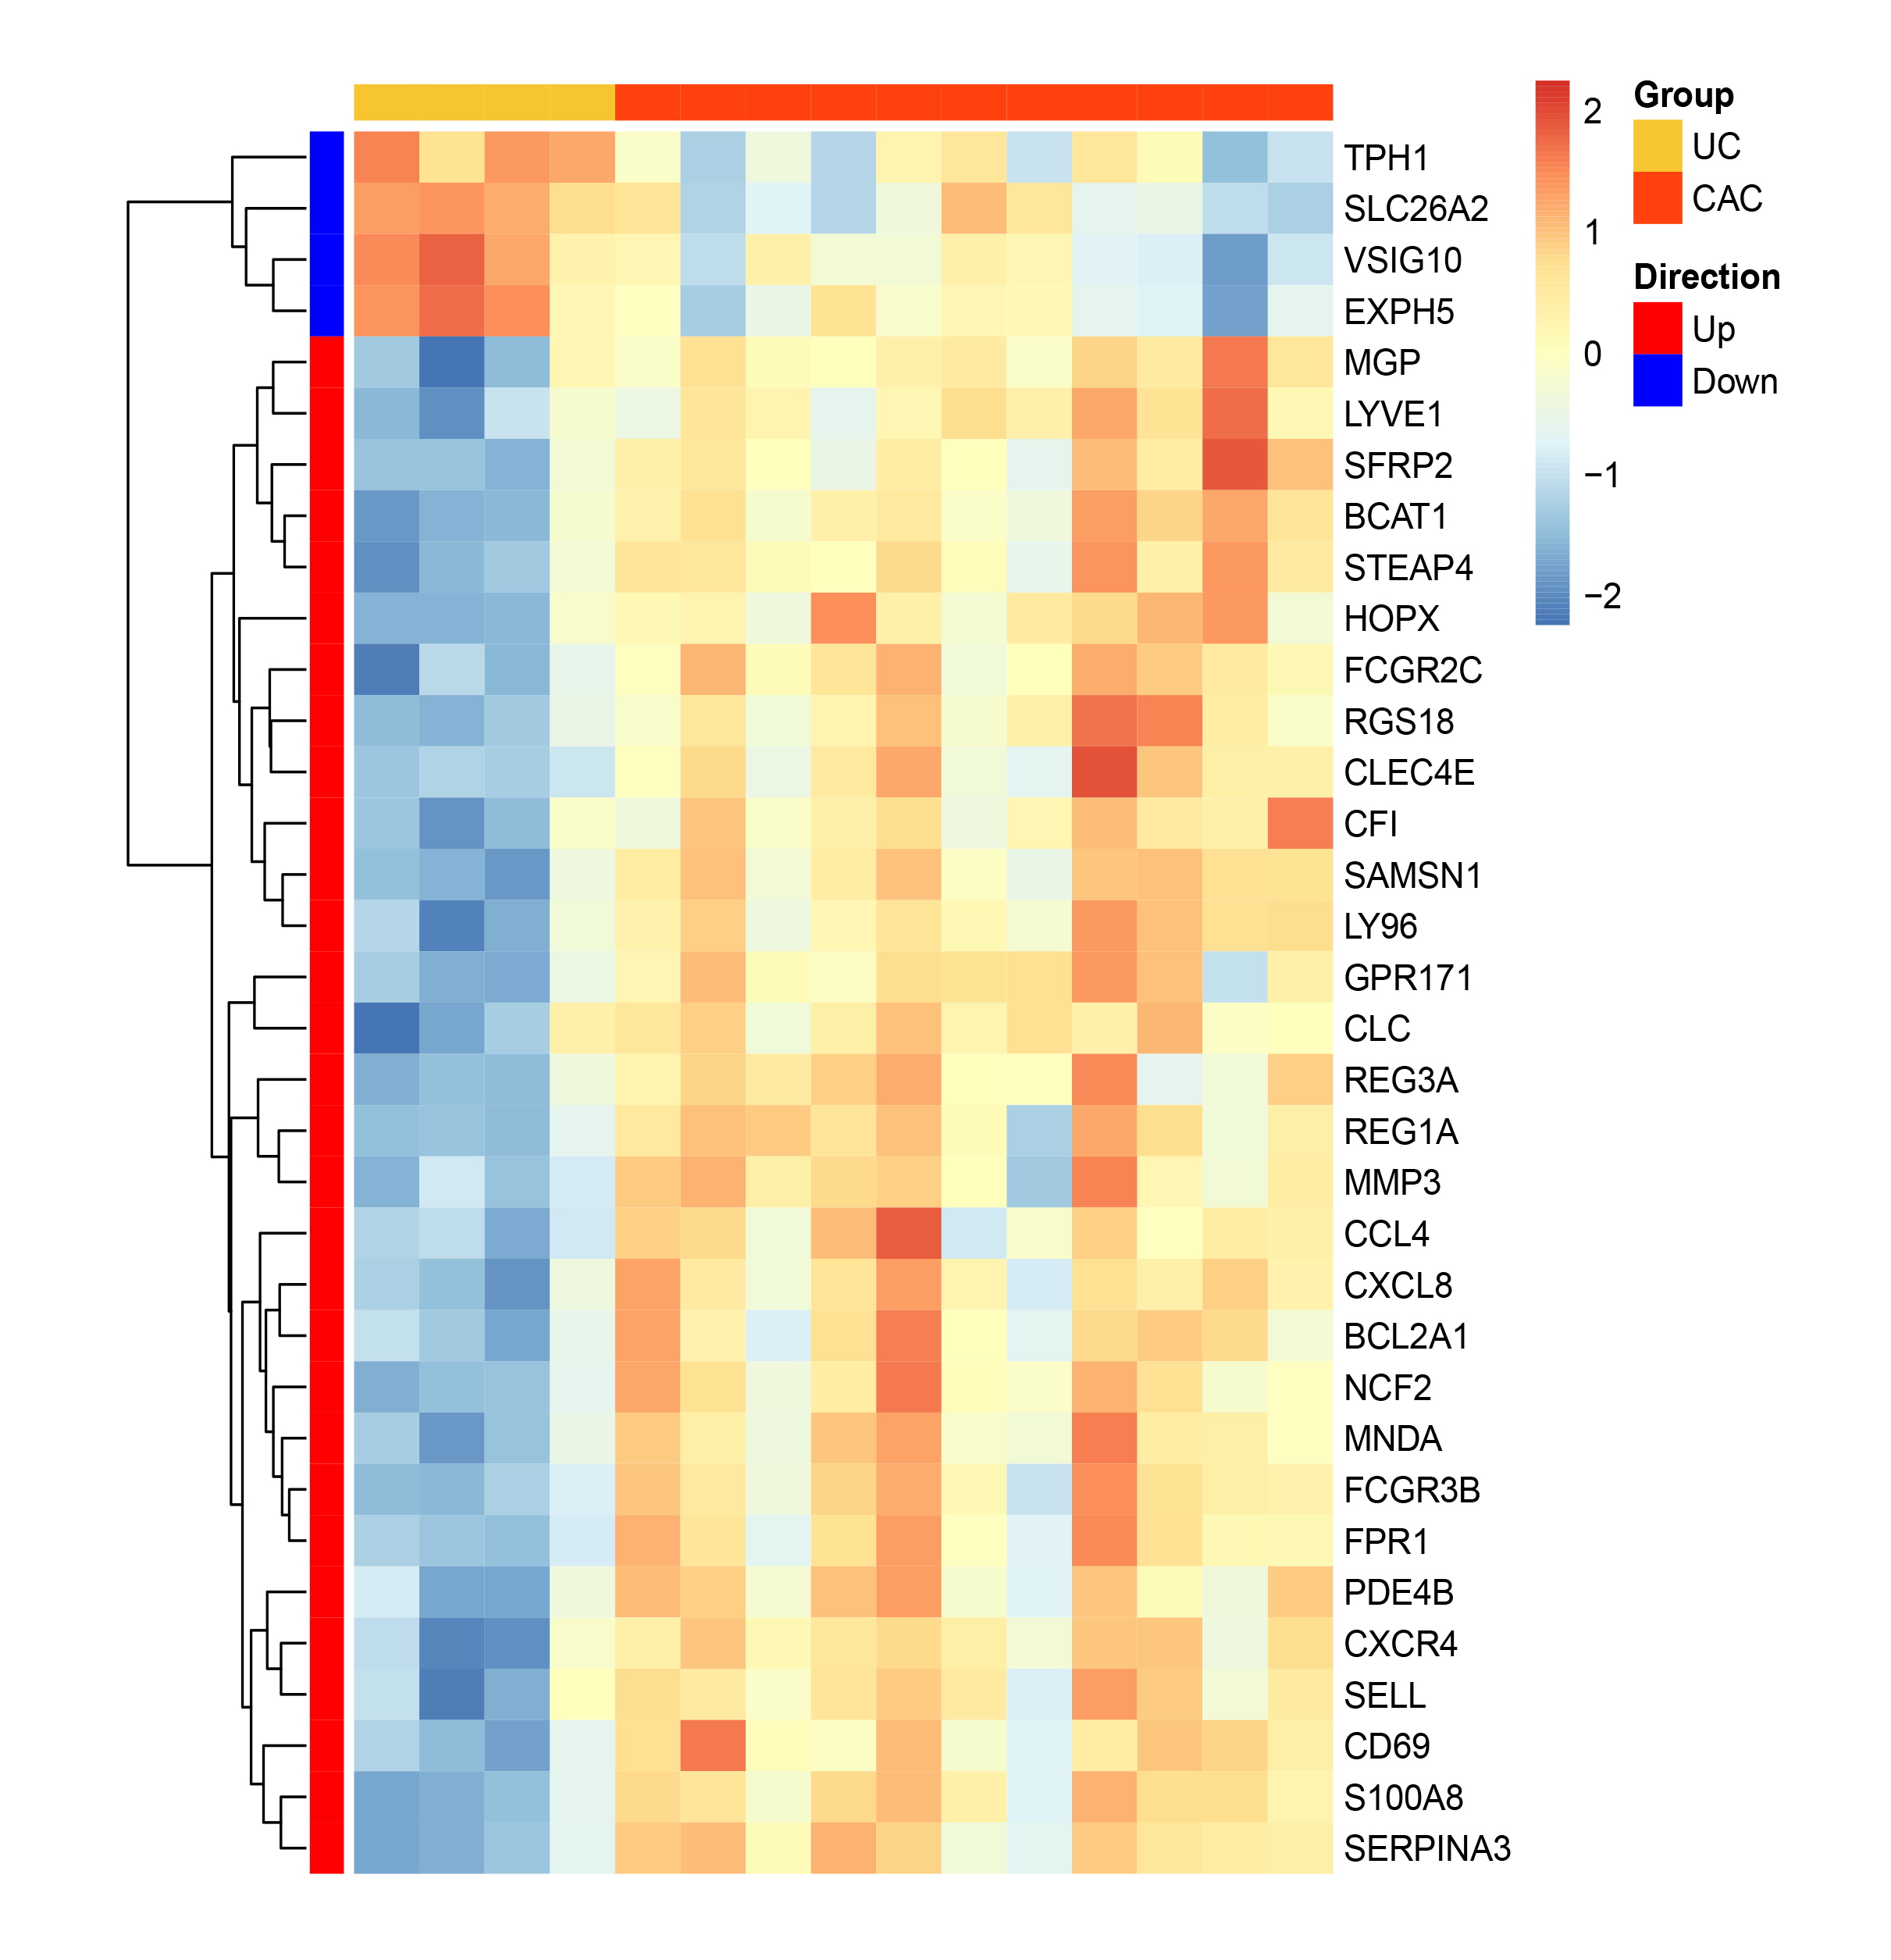


Supplementary Figure 2. Heatmaps of top 34 DEGs in UC and CAC.


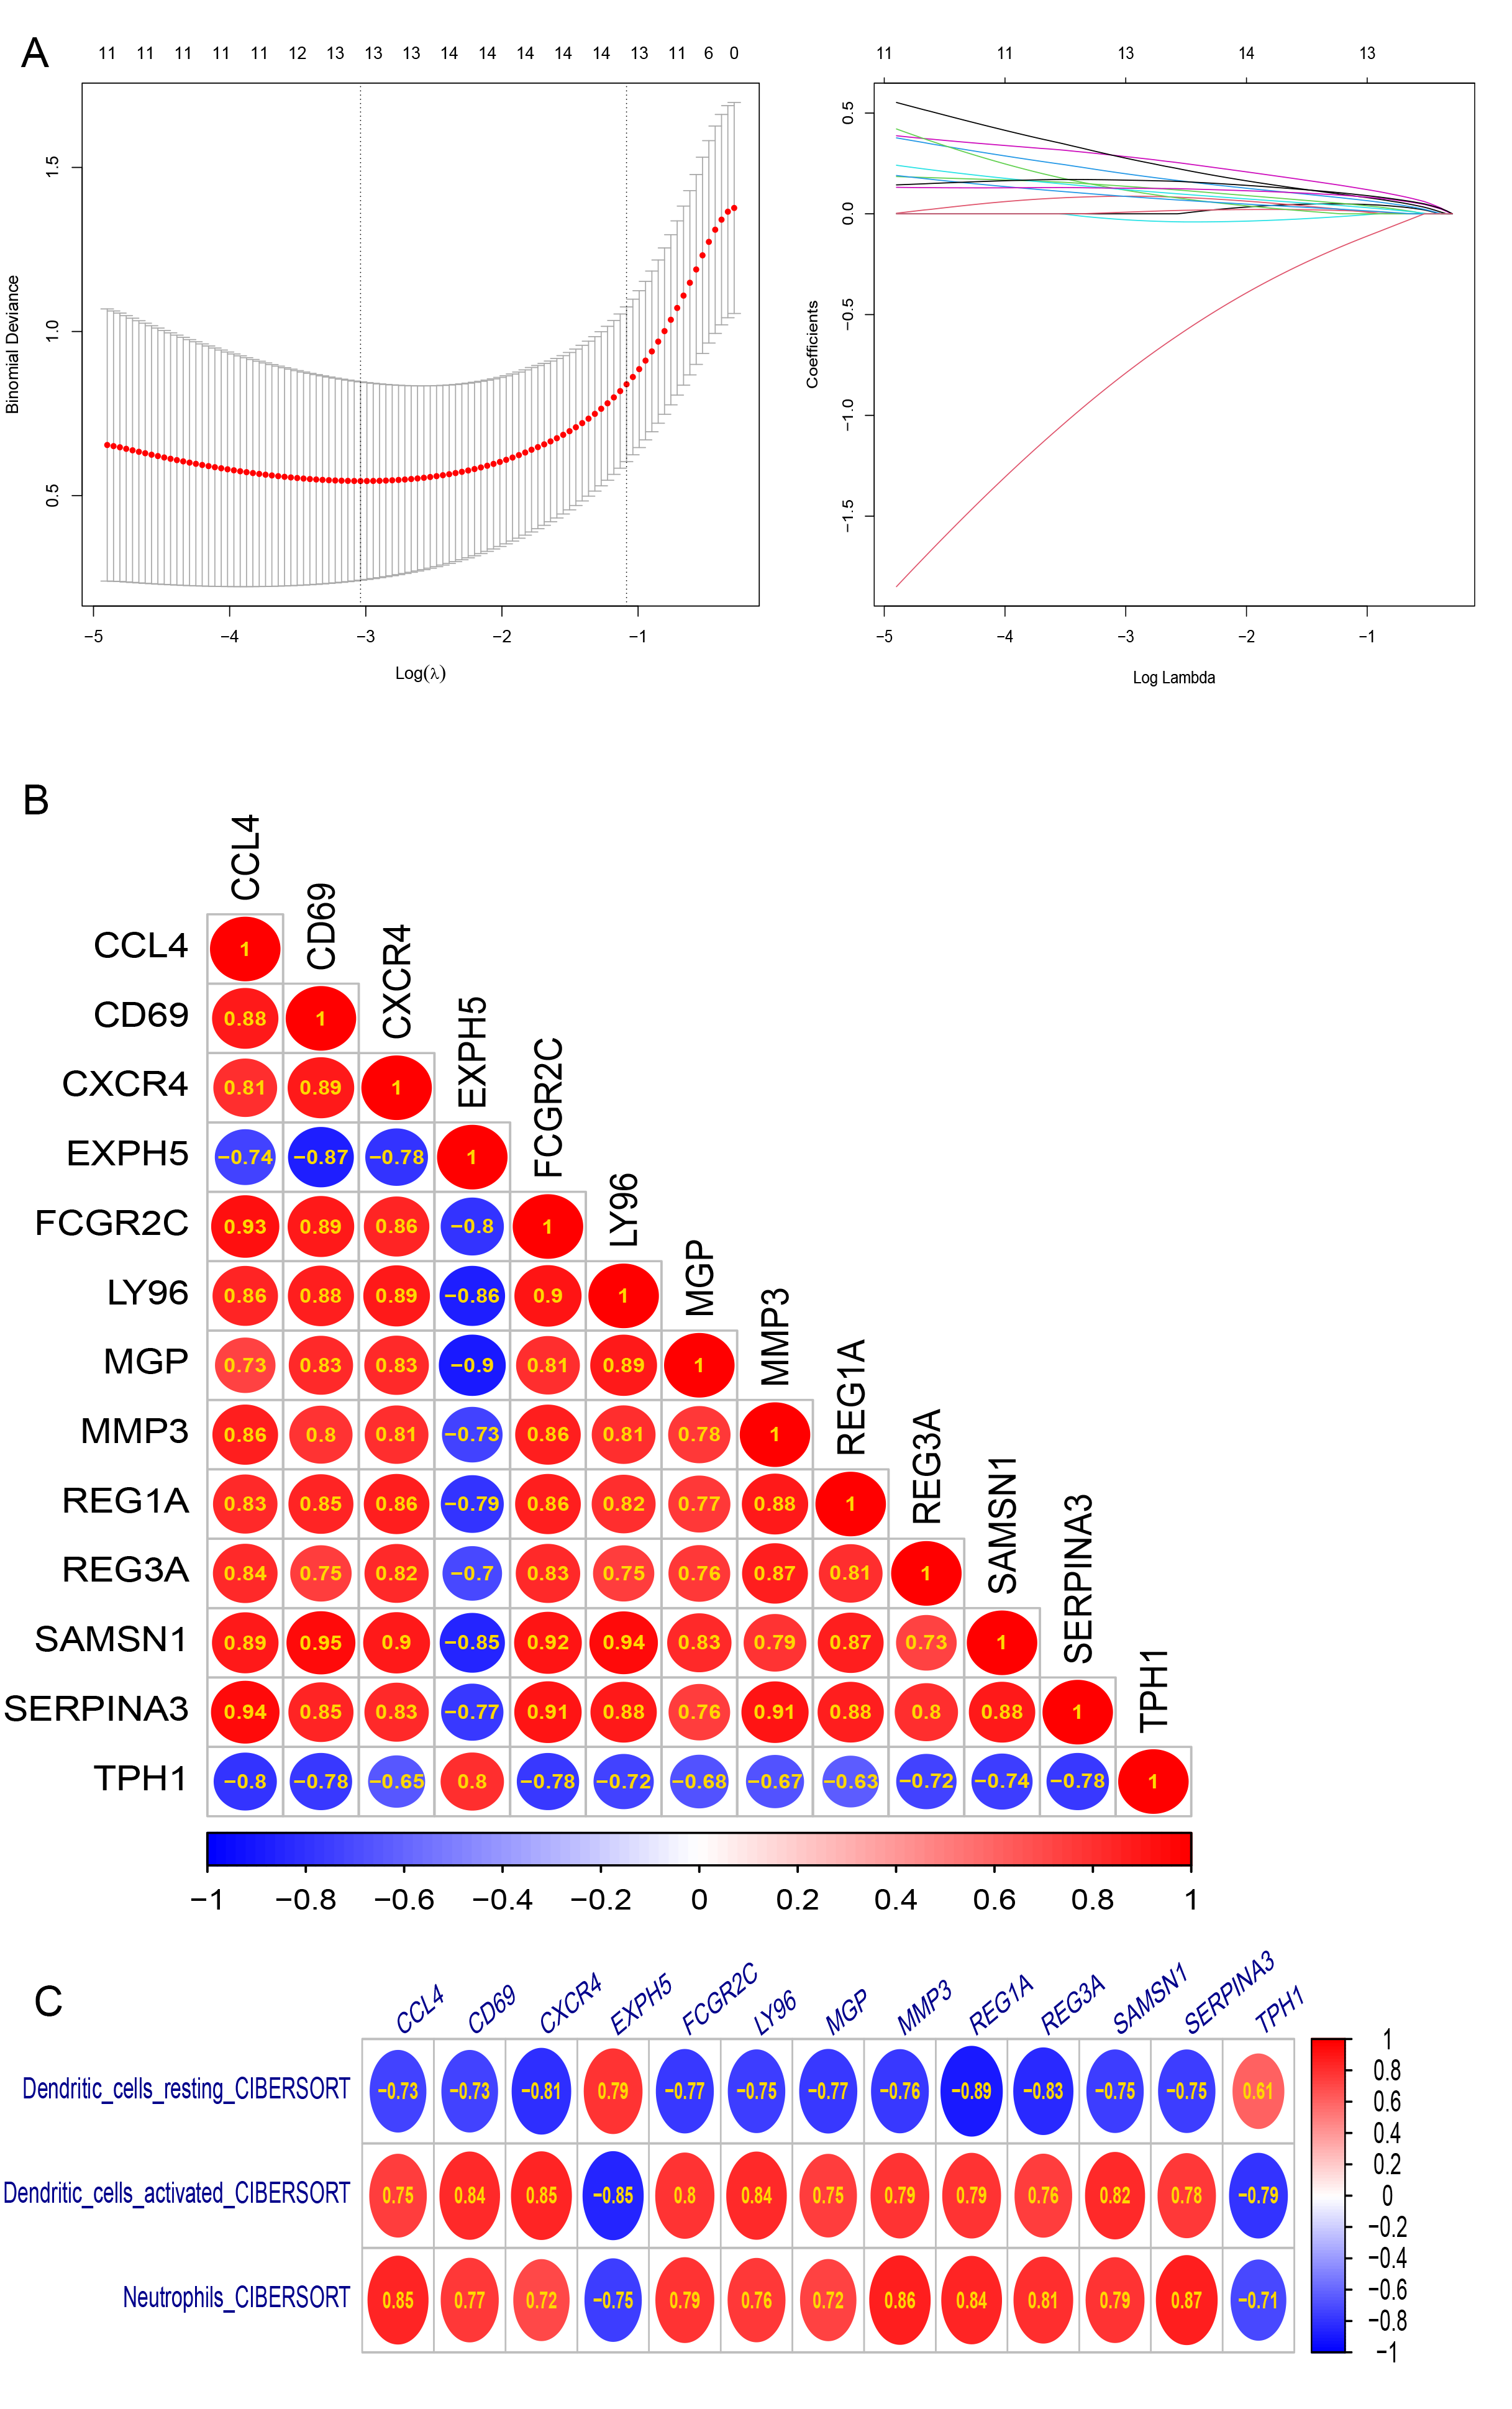


Supplementary Figure 3. (A) Identification of key IC-CACGs via LASSO analysis; (B)Correlation analysis among the identified key IC-CACGs; (C) Correlation analysis between the key IC-CACGs and infiltrating immune cells.


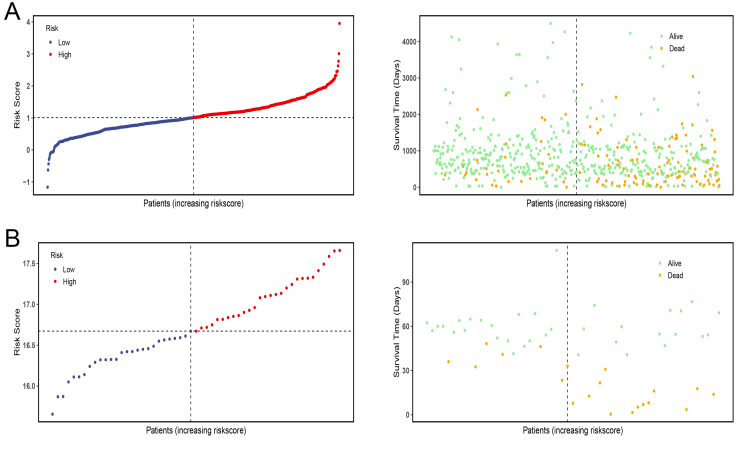


Supplementary Figure 4. Prognostic significance of prognostic genes in the training and validation cohorts. The distribution and survival status plots of prognostic genes in (A) training and (B) validation cohorts.


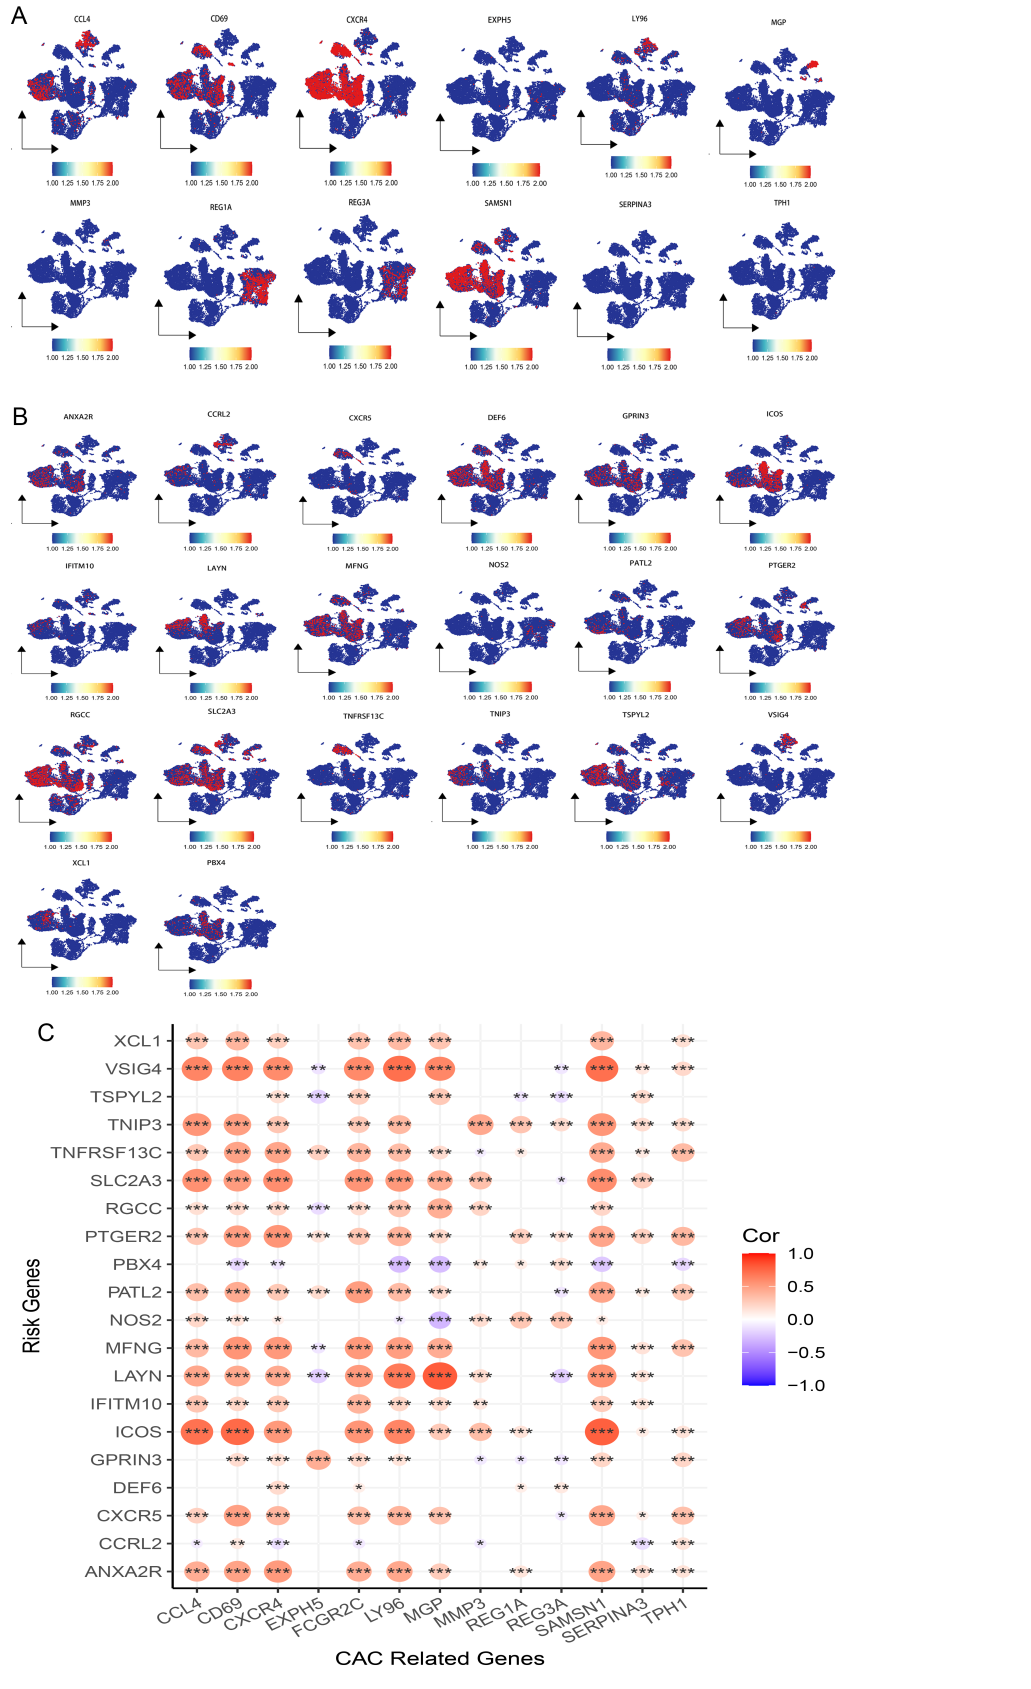


Supplementary Figure 5. Expression patterns and correlation of key IC-CACGs and prognostic genes. (A) The expression pattern of IC-CACGs in CRC scRNA-seq datasets; (B) The expression pattern of prognostic genes in CRC scRNA-seq datasets; (C) Correlation analysis between the key IC-CACGs and prognostic genes.
